# Supplementary material
Source: PubMed Central journal article supplement (PMC3215091)
Supplement: NIHMS236868-supplement-01.pdf [file NIHMS236868-supplement-01.pdf]

**Supplementary Information for:**

Pielak & Chou, "Solution NMR structure of the V27A drug resistant mutant of influenza A M2 channel"

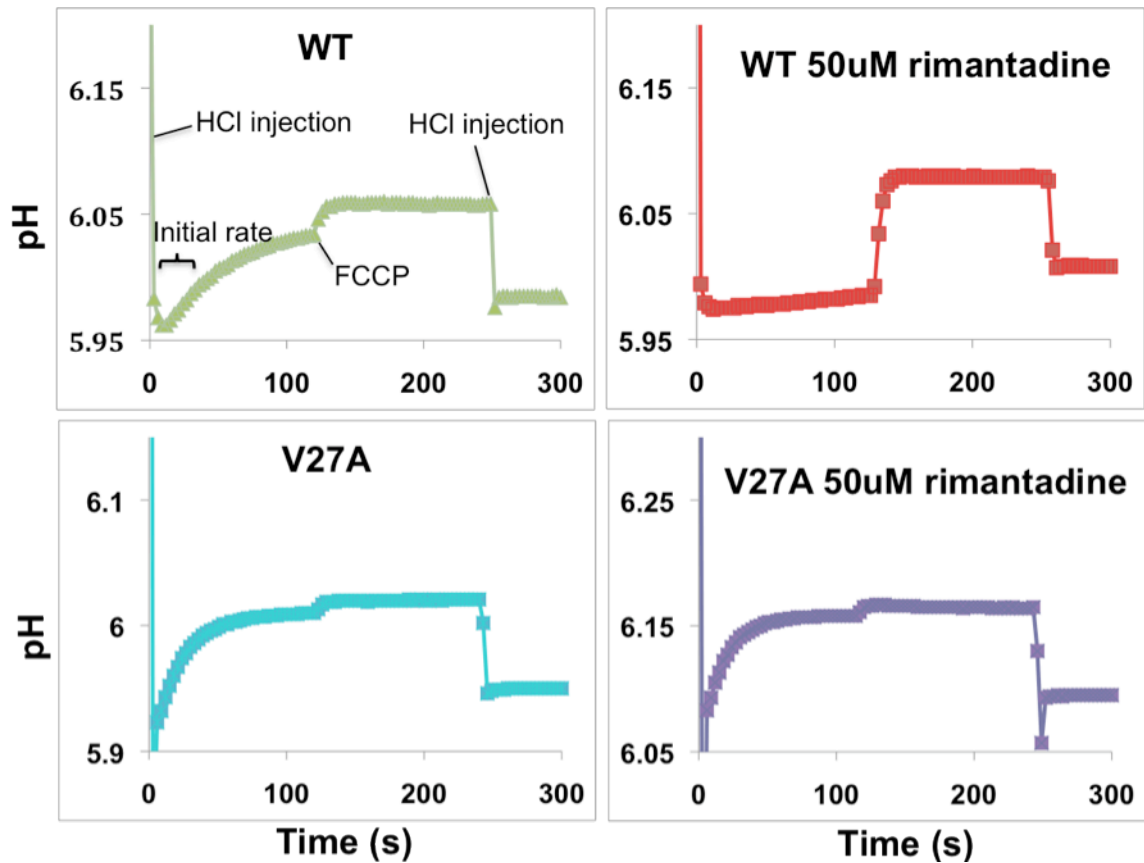

**Figure S1.** Liposome assay: Traces of the M2 rates of proton fluxes of WT and V27A with and without 50uM rimantadine. The V27A mutant displays ~2 fold increased rate of proton flux at pH ~6 as compared to WT. As opposed to WT, the V27A flux is not inhibited by 50uM rimantadine.
